# Supplementary material for: Flavodiiron proteins 1–to-4 function in versatile combinations in O2 photoreduction in cyanobacteria
Source: eLife. 2019 Jul 11;8:e45766. doi: 10.7554/eLife.45766 (PMC6658166; doi:10.7554/eLife.45766)
Supplement: Figure 1—source data 1. [file elife-45766-fig1-data1.xlsx]

## Sheet: Figure 1- Source data 1
	Figure 1-Source data 1. O2 reduction rates of WT, flv4-2/OE, M55 mutants grown in different CO2 levels.
	1A	Low CO2 (0.04% CO2 in air)
		O2 uptake rate (µmol O2.mg Chla -1.hr-1)															Gross O2 evolution rate (µmol O2.mg Chla -1.hr-1)					Ratio Gross O2 evolution/O2 uptake (phase III)
		Dark respiration (average of rates between 0-3 min)					Maximun rate of light-induced O2 uptake during phase I					Light induced O2 uptake during phase III (average of rates between 6-8 min)					Average rates betwee 6 to 8 min of illumination
	Strain	Replicate 1	Replicate 2	Replicate 3	Average	±SD	Replicate 1	Replicate 2	Replicate 3	Average	±SD	Replicate 1	Replicate 2	Replicate 3	Average	±SD	Replicate 1	Replicate 2	Replicate 3	Average	±SD	Replicate 1	Replicate 2	Replicate 3	Average	±SD
	WT	4.21985	5.51401	1.48604	3.73997	2.05642	63.0249	51.5845	62.091	58.9002	6.35272	38.5275	26.8308	33.0575	32.8052	5.85242	240.9	191.813	218.475	217.063	24.5741	6.25268	7.14898	6.60894	6.6702	0.451279
	flv4-2/OE	4.74567	3.25767	5.02505	4.3428	0.950076	103.063	77.8126	119.288	100.055	20.9008	59.3522	42.4925	73.4908	58.4452	15.5191	249.561	184.755	241.03	225.116	35.2122	4.20475	4.34796	3.27973	3.94415	0.579837
	1B	High CO2 (3% CO2 in air)
		O2 uptake rate (µmol O2.mg Chla -1.hr-1)															Gross O2 evolution rate (µmol O2.mg Chla -1.hr-1)					Ratio Gross O2 evolution/O2 uptake (phase III)
		Dark respiration (average of rates between 0-3 min)					Maximun rate of light-induced O2 uptake during phase I					Light-induced O2 uptake during phase II (average of rates between 6-8 min)					Average rates betwee 6 to 8 min of illumination
	Strain	Replicate 1	Replicate 2	Replicate 3	Average	±SD	Replicate 1	Replicate 2	Replicate 3	Average	±SD	Replicate 1	Replicate 2	Replicate 3	Average	±SD	Replicate 1	Replicate 2	Replicate 3	Average	±SD	Replicate 1	Replicate 2	Replicate 3	Average	±SD
	WT	2.14112	5.79487	6.0269	4.65429	2.17957	58.2373	62.1356	47.2936	55.8888	7.69466	50.5908	51.6826	40.2509	47.5081	6.30858	144.256	156.323	154.717	151.766	6.55269	2.85143	3.02467	3.84382	3.23998	0.530073
	flv4-2/OE	10.6971	8.8075	12.5435	10.6827	1.86803	132.64	98.3856	88.3277	106.451	23.2312	121.892	86.3727	76.4608	94.9086	23.8883	316.869	227.387	264.486	269.581	44.9584	2.59958	2.63262	3.4591	2.8971	0.486984
	1C	Low CO2 (0.04% CO2 in air)
		O2 uptake rate (µmol O2.mg Chla -1.hr-1)															Gross O2 evolution rate (µmol O2.mg Chla -1.hr-1)					Ratio Gross O2 evolution/O2 uptake (phase III)
		Dark respiration (average of rates between 0-3 min)					Maximun rate of light-induced O2 uptake during phase I					Light-induced O2 uptake during phase II (average of rates between 6-8 min)					Average rates betwee 6 to 8 min of illumination
	Strain	Replicate 1	Replicate 2	Replicate 3	Average	±SD	Replicate 1	Replicate 2	Replicate 3	Average	±SD	Replicate 1	Replicate 2	Replicate 3	Average	±SD	Replicate 1	Replicate 2	Replicate 3	Average	±SD	Replicate 1	Replicate 2	Replicate 3	Average	±SD
	M55	0.0145324	3.05478	3.00541	2.02491	1.74121	54.197	61.9209	65.3488	60.4889	5.71216	52.4268	50.6314	61.8412	54.9665	6.02098	117.105	106.373	149.165	124.214	22.2645	2.23368	2.10092	2.41207	2.24889	0.156129
