# Supplementary material for: Flavodiiron proteins 1–to-4 function in versatile combinations in O2 photoreduction in cyanobacteria
Source: eLife. 2019 Jul 11;8:e45766. doi: 10.7554/eLife.45766 (PMC6658166; doi:10.7554/eLife.45766)
Supplement: Figure 1—source data 2. [file elife-45766-fig1-data2.xlsx]

## Sheet: Figure 1- Source data 2
Figure 1-Source data 2. Oxygen exchange rates of WT and mutant cells.
Figure 1	Growth condition	Strain	Dark respiration (µmol O2.mg Chla -1.hr-1)	Light-induced O2 uptake rate (µmol O2.mg Chla -1.hr-1)		Gross O2 evolution rate (µmol O2.mg Chla -1.hr-1)		Ratio Gross O2 evolution / O2 uptake (Phase III)
				Maximum rate in phase I	Phase III	Maximum rate in phase I	Phase III
	Low CO2 (0.04% CO2 in air)	WT	3,7 ± 2,1	58,9 ± 6,4	32,8 ± 5,9	156,8 ± 28,5	217,1 ± 24,6	6,7 ± 0,5
		flv4-2/OE	4,3 ± 1,0	100,1 ± 20,9	58,4 ± 15,5	192,6 ± 33,2	225,1 ± 35,2	3,9 ± 0,6
	High CO2 (3% CO2 in air)	WT	4,7 ± 2,2	55,9 ± 7,7	47,5 ± 6,3	100,9 ± 28,9	151,8 ± 6,6	3,2 ± 0,5
		flv4-2/OE	10,7 ± 1,9	106,5 ± 23,2	94,9 ± 23,9	179,2 ± 33,3	269,6 ± 45	2,9 ± 0,5
	Low CO2 (0.04% CO2 in air)	M55	2,0 ± 1,7	60,5 ± 5,7	55,0 ± 6,0	55,6 ± 7,0	124,2 ± 22,3	2,2 ± 0,2
Figure 2	Low CO2; pH 6.0	WT	2,7 ± 0,0	55,9 ± 4,9	31,2 ± 5,4	108,3 ± 28,7	132 ± 36,4	4,2 ± 0,4
		∆flv1/∆flv3	1,5 ± 0,3	20,3 ± 2,6	16,0 ± 4,2	63,0 ± 2,8	108,9 ± 13,0	7,2 ± 2,7
		∆flv4	5,4 ± 0,3	22,1 ± 7,0	-0,4 ± 1,0	119,2 ± 12,8	146,0 ± 21,4	-
		∆flv3/∆flv4	4,7 ± 3,4	0,9 ± 3,4	-0,4 ± 4,1	87,1 ± 7,6	132,0 ± 15,8	-
	Low CO2; pH 7.5 (+ Na2CO3)	WT	3,5 ± 0,4	41,3 ± 6,7	17,1 ± 4,0	125,0 ± 5,4	144,7 ± 15,0	8,6 ± 1,4
		∆flv1/∆flv3	2,9 ± 0,8	12,6 ± 1,3	4,0 ± 1,0	86,4 ± 10,6	145,4 ± 21,1	37,5 ± 4,9
		∆flv4	5,8 ± 1,2	15,7 ± 5,7	0,5 ± 3,9	114,2 ± 7,2	147,3 ± 13,4	-
		∆flv3/∆flv4	6,1 ± 1,9	1,7 ± 2,0	0,0 ± 3,6	106,9 ± 10,8	151,7 ± 8,7	-
	Low CO2; pH 7.5 (- Na2CO3)	WT	3,4 ± 1,6	65,4 ± 3,3	32,7 ± 4,0	221,1 ± 10,8	229,5 ± 11,8	7,1 ± 1,2
		∆flv1/∆flv3	2,3 ± 1,7	18,4 ± 2,7	9,9 ± 1,0	126,0 ± 5,3	182,1 ± 12,7	18,5 ± 2,0
		∆flv4	6,4 ± 2,5	18,5 ± 14,4	2,8 ± 6,6	142,7 ± 11,5	205,4 ± 23,8	-
		∆flv3/∆flv4	5,5 ± 3,4	1,5 ± 1,3	-1,2 ± 1,4	171,1 ± 8,0	188,7 ± 11,7	-
	Low CO2; pH 9.0	WT	6,5 ± 1,8	32,6 ± 3,3	3,2 ± 3,4	151,0 ± 7,1	185,0 ± 10,3	-
		∆flv1/∆flv3	7,2 ± 1,2	3,7 ± 0,2	-3,9 ± 2,0	118,5 ± 8,4	176,8 ± 15,8	-
		∆flv4	7,3 ± 2,4	26,0 ± 3,2	-1,8 ± 3,2	147,3 ± 9,7	191,7 ± 8,3	-
		∆flv3/∆flv4	7,3 ± 1,6	2,3 ± 2,0	-5,0 ± 1,6	87,9 ± 18,5	175 ± 13,5	-
Figure 5	500 µmol photons m-2s-1	WT		41,2 ± 6,0		122,4 ± 16,6	147,5 ± 12,0
		∆flv1/∆flv3		12,5 ± 1,2		97,8 ± 8,1	147,3 ± 21,5
		∆flv4		14,4 ± 5,0		111,1 ± 12,5	132,1 ± 8,7
	1000 µmol photons m-2 .s-1	WT		87,7 ± 7,2		193,8 ± 17,9	240,7 ± 22,5
		∆flv1/∆flv3		21,0 ± 3,7		88,8 ± 11,8	139,8 ± 15,5
		∆flv4		32,2 ± 5,4		139,8 ± 8,9	175,8 ± 23,4
	1500 µmol photons m-2 s-1	WT		96,4 ± 9,1		220,6 ± 33,4	267,9 ± 36,6
		∆flv1/∆flv3		24,5 ± 3,0		93,8 ± 18,8	141,0 ± 26,8
		∆flv4		40,7 ± 5,5		156,2 ± 7,0	196,9 ± 3,1
Figure 6	OD 750nm= 0.2	WT	5,7 ± 2,0	52,5 ± 4,0	24,6 ± 1,6	140,6 ± 15,8	182,9 ± 13,9
		∆flv1/∆flv3	3,5 ± 0,5	10,2 ± 3,1	3,1 ± 2,6	59,9 ± 15,8	145 ± 27,4
	OD 750nm= 0.5	WT	3,5 ± 4,1	40,7 ± 6,0	17,8 ± 5,0	89,9 ± 7,3	141,1 ± 14,5
		∆flv1/∆flv3	9,8 ± 0,5	0,6 ± 3,4	-3,9 ± 3,0	106,5 ± 1,5	149,8 ± 15,7
