# Supplementary material for: Flavodiiron proteins 1–to-4 function in versatile combinations in O2 photoreduction in cyanobacteria
Source: eLife. 2019 Jul 11;8:e45766. doi: 10.7554/eLife.45766 (PMC6658166; doi:10.7554/eLife.45766)
Supplement: Figure 2—source data 1. [file elife-45766-fig2-data1.xlsx]

## Sheet: Figure 2- Source data 1
	Figure 2-Source data 1. O2 reduction rates of WT and FDP mutants grown at different pH levels.
		pH 6
		O2 uptake rate (µmol O2.mg Chla -1.hr-1)												Gross O2 evolution rate (µmol O2.mg Chla -1.hr-1)				Ratio Gross O2 evolution/O2 uptake (phase III)
		Dark respiration (average of rates between 0-3 min)				Maximun rate of light-induced O2 uptake during phase I				Light induced O2 uptake during phase III (average of rates between 6-8 min)				Average rates betwee 6 to 8 min of illumination
	Strain	Replicate 1	Replicate 3	Average	±SD	Replicate 1	Replicate 3	Average	±SD	Replicate 1	Replicate 3	Average	±SD	Replicate 1	Replicate 3	Average	±SD	Replicate 1	Replicate 3	Average	±SD
	WT	2.66049	2.68062	2.67056	0.0142356	59.4098	52.4646	55.9372	4.911	34.9696	27.375	31.1723	5.37018	158.289	106.88	132.585	36.3519	4.52648	3.90428	4.21538	0.439958
	∆flv1/∆flv3	1.32047	1.75989	1.54018	0.310714	22.0922	18.4692	20.2807	2.56184	13.0621	18.9707	16.0164	4.17804	118.167	99.7169	108.942	13.0464	9.04659	5.25636	7.15147	2.6801
	∆flv4	5.13381	5.57193	5.35287	0.309797	17.1328	27.1009	22.1169	7.04851	-1.1	0.328074	-0.385963	1.0098	130.903	80.7371	105.82	35.4723
	∆flv3/∆flv4	2.29343	7.11996	4.70669	3.41287	3.22552	-1.51213	0.8567	3.35002	2.45657	-3.2933	-0.418367	4.06578	143.187	120.908	132.048	15.7535
		pH 7.5 (+ Na2CO3)
		O2 uptake rate (µmol O2.mg Chla -1.hr-1)															Gross O2 evolution rate (µmol O2.mg Chla -1.hr-1)					Ratio Gross O2 evolution/O2 uptake (phase III)
		Dark respiration (average of rates between 0-3 min)					Maximun rate of light-induced O2 uptake during phase I					Light induced O2 uptake during phase III (average of rates between 6-8 min)					Average rates betwee 6 to 8 min of illumination
	Strain	Replicate 1	Replicate 2	Replicate 3	Average	±SD	Replicate 1	Replicate 2	Replicate 3	Average	±SD	Replicate 1	Replicate 2	Replicate 3	Average	±SD	Replicate 1	Replicate 2	Replicate 3	Average	±SD	Replicate 1	Replicate 2	Replicate 3	Average	±SD
	WT	3.62843	2.99113	3.79262	3.47073	0.423381	41.6207	47.7733	34.442	41.2787	6.67225	14.8247	19.9491	16.4069	17.0603	2.6239	150.547	155.846	127.631	144.675	14.9959	10.1551	7.81219	7.77911	8.58214	1.36233
	∆flv1/∆flv3	3.7922	2.7253	2.26408	2.92719	0.783806	12.8861	11.137	13.7078	12.577	1.31298	4.30826	2.82819	4.73924	3.95856	1.00237	151.347	121.993	162.841	145.394	21.0647	35.1295	43.1347	34.3602	37.5415	4.85914
	∆flv4	4.67855	7.01865	5.7988	5.832	1.1704	19.0007	9.11546	18.8574	15.6578	5.66632	4.46196	-3.41073	0.307562	0.45293	3.93836	154.674	193.279	131.848	159.934	31.0514
	∆flv3/∆flv4	4.4853	8.19244	5.77188	6.14988	1.88225	1.72854	-0.30711	3.67929	1.70024	1.99335	1.67754	-4.10992	2.58164	0.0497524	3.63064	153.509	159.379	142.215	151.701	8.72374
		pH 7.5 (- Na2CO3)
		O2 uptake rate (µmol O2.mg Chla -1.hr-1)															Gross O2 evolution rate (µmol O2.mg Chla -1.hr-1)					Ratio Gross O2 evolution/O2 uptake (phase III)
		Dark respiration (average of rates between 0-3 min)					Maximun rate of light-induced O2 uptake during phase I					Light induced O2 uptake during phase III (average of rates between 6-8 min)					Average rates betwee 6 to 8 min of illumination
	Strain	Replicate 1	Replicate 2	Replicate 3	Average	±SD	Replicate 1	Replicate 2	Replicate 3	Average	±SD	Replicate 1	Replicate 2	Replicate 3	Average	±SD	Replicate 1	Replicate 2	Replicate 3	Average	±SD	Replicate 1	Replicate 2	Replicate 3	Average	±SD
	WT	2.05085	5.11682	3.15831	3.44199	1.55255	67.1817	67.5468	61.5947	65.4411	3.33602	36.9912	32.0818	29.1327	32.7352	3.96978	218.166	228.469	241.8	229.479	11.8493	5.89779	7.12145	8.29996	7.1064	1.20116
	∆flv1/∆flv3	0.313549	3.28767	3.31766	2.30629	1.72583	19.3162	20.6295	15.3914	18.4457	2.72539	10.7504	10.1961	8.83874	9.92843	0.983549	173.644	196.734	176.058	182.145	12.6916	16.1523	19.295	19.9189	18.4554	2.01882
	∆flv4	3.74957	8.70938	6.87079	6.44324	2.50739	35.1452	10.1334	10.361	18.5465	14.3753	10.4111	-1.60713	-0.394209	2.80326	6.61646	232.879	192.694	190.553	205.375	23.8431
	∆flv3/∆flv4	2.50204	4.72064	9.21585	5.47951	3.42063	1.62852	2.71423	0.0939939	1.47891	1.31651	0.281216	-1.35571	-2.50524	-1.19325	1.40032	199.695	176.419	190.022	188.712	11.6929
		pH 9
		O2 uptake rate (µmol O2.mg Chla -1.hr-1)															Gross O2 evolution rate (µmol O2.mg Chla -1.hr-1)
		Dark respiration (average of rates between 0-3 min)					Maximun rate of light-induced O2 uptake during phase I					Light induced O2 uptake during phase III (average of rates between 6-8 min)					Average rates betwee 6 to 8 min of illumination
	Strain	Replicate 1	Replicate 2	Replicate 3	Average	±SD	Replicate 1	Replicate 2	Replicate 3	Average	±SD	Replicate 1	Replicate 2	Replicate 3	Average	±SD	Replicate 1	Replicate 2	Replicate 3	Average	±SD
	WT	7.51056	7.61213	4.37841	6.50037	1.83837	32.1318	29.6034	36.0631	32.5994	3.25512	0.199905	6.85769	2.64997	3.23585	3.36734	173.771	193.925	187.183	184.96	10.2591
	∆flv1/∆flv3	6.84724	8.5329	6.27445	7.2182	1.17403	3.48407	3.66499	3.91819	3.68908	0.218063	-4.41962	-5.58677	-1.63101	-3.87914	2.03251	189.518	159.169	181.831	176.839	15.778
	∆flv4	4.72318	9.55646	7.76473	7.34812	2.44342	26.4399	22.6115	28.8967	25.9827	3.16745	1.43865	-4.93593	-1.88059	-1.79262	3.1882	193.767	182.504	198.74	191.671	8.31831
	∆flv3/∆flv4	5.502	8.26692	8.16478	7.31124	1.56767	4.54998	0.525185	1.8872	2.32079	2.04713	-3.43689	-6.63835	-4.84872	-4.97465	1.60444	190.005	171.15	163.896	175.017	13.4771
