# Supplementary material for: Flavodiiron proteins 1–to-4 function in versatile combinations in O2 photoreduction in cyanobacteria
Source: eLife. 2019 Jul 11;8:e45766. doi: 10.7554/eLife.45766 (PMC6658166; doi:10.7554/eLife.45766)
Supplement: Figure 3—source data 1. [file elife-45766-fig3-data1.xlsx]

## Sheet: Figure 3- Source data 1
	Figure 3B- Source data 1. Transcript abundance of flv1, flv2, flv3 and flv4 genes
	flv1		FC			FC			flv2		FC			FC			flv3		FC			FC			flv4		FC			FC
	Condition	Replicate	Result from Biogazelle	Average of ctrl	Normalized to ctrl	Average	SD		Condition	Replicate	Result from Biogazelle	Average of ctrl	Normalized to ctrl	Average	SD		Condition	Replicate	Result from Biogazelle	Average of ctrl	Normalized to ctrl	Average	SD		Condition	Replicate	Result from Biogazelle	Average of ctrl	Normalized to ctrl	Average	SD
	pH 8.2 (ctrl conditon)	Biol. 1	0.834856		0.789763				pH 8.2 (ctrl conditon)	Biol. 1	1.42186		1.34506				pH 8.2 (ctrl conditon)	Biol. 1	0.685903		0.648856				pH 8.2 (ctrl conditon)	Biol. 1	0.99105		0.937521
		Biol. 2	0.764192		0.722917					Biol. 2	1.7971		1.70003					Biol. 2	0.779649		0.737539					Biol. 2	1.46532		1.38618
		Biol. 3	1.11135		1.05132					Biol. 3	2.22708		2.10679					Biol. 3	0.855302		0.809105					Biol. 3	1.59845		1.51212
		Biol. 4	1.51799	1.0571	1.436	1	0.32337			Biol. 4	1.98644	1.85812	1.87915	1.75776	0.321564			Biol. 4	1.09017	0.852755	1.03128	0.806696	0.163444			Biol. 4	1.192	1.31171	1.12762	1.24086	0.257899
	pH 9.0	Biol. 1	0.751399		0.710815				pH 9.0	Biol. 1	0.293629		0.27777				pH 9.0	Biol. 1	1.21094		1.14553				pH 9.0	Biol. 1	0.239165		0.226247
		Biol. 2	0.685245		0.648234					Biol. 2	0.46425		0.439175					Biol. 2	1.66403		1.57415					Biol. 2	0.286623		0.271142
		Biol. 3	0.236338		0.223573					Biol. 3	0.224492		0.212367					Biol. 3	0.616529		0.58323					Biol. 3	0.325711		0.308118
		Biol. 4	0.518399	0.547845	0.490399	0.518255	0.217246			Biol. 4	0.408631	0.347751	0.38656	0.328968	0.102761			Biol. 4	1.47426	1.24144	1.39463	1.17439	0.431515			Biol. 4	0.478726	0.332556	0.452869	0.314594	0.0980735
	pH 7.5 (- Na2CO3)	Biol. 1	1.26707		1.19863				pH 7.5 (- Na2CO3)	Biol. 1	1.63945		1.5509				pH 7.5 (- Na2CO3)	Biol. 1	1.04888		0.992224				pH 7.5 (- Na2CO3)	Biol. 1	1.69329		1.60183
		Biol. 2	1.6077		1.52087					Biol. 2	1.85053		1.75058					Biol. 2	1.21321		1.14768					Biol. 2	1.68536		1.59433
		Biol. 3	1.32678	1.40052	1.25511	1.32487	0.172069			Biol. 3	1.54126	1.67708	1.45801	1.58649	0.149496			Biol. 3	1.20498	1.15569	1.1399	1.09327	0.0875934			Biol. 3	1.27803	1.55222	1.209	1.46839	0.224667
	pH 7.5 (+ Na2CO3)	Biol. 1	0.950301		0.898973				pH 7.5 (+ Na2CO3)	Biol. 1	1.35704		1.28374				pH 7.5 (+ Na2CO3)	Biol. 1	0.899345		0.850769				pH 7.5 (+ Na2CO3)	Biol. 1	1.56706		1.48242
		Biol. 2	1.80756	1.37893	1.70993	1.30445	0.573435			Biol. 2	1.85771	1.60737	1.75737	1.52056	0.334907			Biol. 2	1.52223	1.21079	1.44001	1.14539	0.416658			Biol. 2	1.67972	1.62339	1.58899	1.53571	0.0753567
	One Way Analysis of Variance (ANOVA)
	flv1								flv2								flv3								flv4
	Comparison	P-value							Comparison	P-value							There is not a statistically significant difference.								Comparison	P-value
	pH7.5- vs. pH9.0	0.043							pH8.2 vs. pH9.0	<0.001															pH7.5- vs. pH9.0	<0.001
	pH7.5+ vs. pH9.0	0.077							pH7.5- vs. pH9.0	<0.001															pH7.5+ vs. pH9.0	<0.001
	pH8.2 vs. pH9.0	0.196							pH7.5+ vs. pH9.0	<0.001															pH8.2 vs. pH9.0	<0.001
	pH7.5- vs. pH8.2	0.484							pH8.2 vs. pH7.5+	0.618															pH7.5+ vs. pH8.2	0.298
	pH7.5+ vs. pH8.2	0.482							pH8.2 vs. pH7.5-	0.598															pH7.5- vs. pH8.2	0.289
	pH7.5- vs. pH7.5+	0.943							pH7.5- vs. pH7.5+	0.766															pH7.5+ vs. pH7.5-	0.711
