# Supplementary material for: Flavodiiron proteins 1–to-4 function in versatile combinations in O2 photoreduction in cyanobacteria
Source: eLife. 2019 Jul 11;8:e45766. doi: 10.7554/eLife.45766 (PMC6658166; doi:10.7554/eLife.45766)
Supplement: Figure 4—source data 1. [file elife-45766-fig4-data1.xlsx]

## Sheet: Figure 4- Source data 1
	Figure 4- Source data 1. Growth of the different FDPs mutants under fluctuating light intensities
	FL 20/500												FL 50/500
	pH6						pH9						pH6						pH9
	Day 0	OD 750 nm					Day 0	OD 750 nm					Day 0	OD 750 nm					Day 0	OD 750 nm
	Strain	Replicate 1	Replicate 2	Average	±SD		Strain	Replicate 1	Replicate 2	Average	±SD		Strain	Replicate 1	Replicate 2	Average	±SD		Strain	Replicate 1	Replicate 2	Average	±SD
	WT	0.128	0.112	0.12	0.0113137		WT	0.101	0.098	0.0995	0.00212132		WT	0.126	0.109	0.1175	0.0120208		WT	0.101	0.098	0.0995	0.00212132
	∆flv1/∆flv3	0.116	0.113	0.1145	0.00212132		∆flv1/∆flv3	0.099	0.101	0.1	0.00141421		∆flv1/∆flv3	0.126	0.109	0.1175	0.0120208		∆flv1/∆flv3	0.099	0.104	0.1015	0.00353553
	∆flv4	0.105	0.109	0.107	0.00282843		∆flv4	0.1	0.101	0.1005	0.000707107		∆flv4	0.126	0.109	0.1175	0.0120208		∆flv4	0.102	0.103	0.1025	0.000707107
	Day 1	OD 750 nm					Day 1	OD 750 nm					Day 1	OD 750 nm					Day 1	OD 750 nm
	Strain	Replicate 1	Replicate 2	Average	±SD		Strain	Replicate 1	Replicate 2	Average	±SD		Strain	Replicate 1	Replicate 2	Average	±SD		Strain	Replicate 1	Replicate 2	Average	±SD
	WT	0.237	0.217	0.227	0.0141421		WT	0.275	0.263	0.269	0.00848528		WT	0.24	0.236	0.238	0.00282843		WT	0.432	0.424	0.428	0.00565685
	∆flv1/∆flv3	0.218	0.182	0.2	0.0254558		∆flv1/∆flv3	0.191	0.197	0.194	0.00424264		∆flv1/∆flv3	0.24	0.236	0.238	0.00282843		∆flv1/∆flv3	0.326	0.34	0.333	0.00989949
	∆flv4	0.213	0.215	0.214	0.00141421		∆flv4	0.258	0.298	0.278	0.0282843		∆flv4	0.24	0.236	0.238	0.00282843		∆flv4	0.58	0.515	0.5475	0.0459619
	Day 2	OD 750 nm					Day 2	OD 750 nm					Day 2	OD 750 nm					Day 2	OD 750 nm
	Strain	Replicate 1	Replicate 2	Average	±SD		Strain	Replicate 1	Replicate 2	Average	±SD		Strain	Replicate 1	Replicate 2	Average	±SD		Strain	Replicate 1	Replicate 2	Average	±SD
	WT	0.245	0.214	0.2295	0.0219203		WT	0.32	0.304	0.312	0.0113137		WT	0.33	0.3	0.315	0.0212132		WT	0.742	0.736	0.739	0.00424264
	∆flv1/∆flv3	0.18	0.16	0.17	0.0141421		∆flv1/∆flv3	0.153	0.16	0.1565	0.00494975		∆flv1/∆flv3	0.33	0.3	0.315	0.0212132		∆flv1/∆flv3	0.383	0.41	0.3965	0.0190919
	∆flv4	0.184	0.187	0.1855	0.00212132		∆flv4	0.31	0.402	0.356	0.0650538		∆flv4	0.33	0.3	0.315	0.0212132		∆flv4	0.827	0.761	0.794	0.046669
	Day 3	OD 750 nm					Day 3	OD 750 nm					Day 3	OD 750 nm					Day 3	OD 750 nm
	Strain	Replicate 1	Replicate 2	Average	±SD		Strain	Replicate 1	Replicate 2	Average	±SD		Strain	Replicate 1	Replicate 2	Average	±SD		Strain	Replicate 1	Replicate 2	Average	±SD
	WT	0.298	0.27	0.284	0.019799		WT	0.565	0.53	0.5475	0.0247487		WT	0.42	0.402	0.411	0.0127279		WT	1.29	1.22	1.255	0.0494975
	∆flv1/∆flv3	0.182	0.175	0.1785	0.00494975		∆flv1/∆flv3	0.159	0.171	0.165	0.00848528		∆flv1/∆flv3	0.42	0.402	0.411	0.0127279		∆flv1/∆flv3	0.601	0.653	0.627	0.0367696
	∆flv4	0.249	0.252	0.2505	0.00212132		∆flv4	0.621	0.71	0.6655	0.0629325		∆flv4	0.42	0.402	0.411	0.0127279		∆flv4	1.21	1.16	1.185	0.0353553
	Day 4	OD 750 nm					Day 4	OD 750 nm					Day 4	OD 750 nm					Day 4	OD 750 nm
	Strain	Replicate 1	Replicate 2	Average	±SD		Strain	Replicate 1	Replicate 2	Average	±SD		Strain	Replicate 1	Replicate 2	Average	±SD		Strain	Replicate 1	Replicate 2	Average	±SD
	WT	0.37	0.352	0.361	0.0127279		WT	0.99	0.982	0.986	0.00565685		WT	0.57	0.55	0.56	0.0141421		WT	2.01	1.93	1.97	0.0565685
	∆flv1/∆flv3	0.19	0.187	0.1885	0.00212132		∆flv1/∆flv3	0.157	0.165	0.161	0.00565685		∆flv1/∆flv3	0.57	0.55	0.56	0.0141421		∆flv1/∆flv3	0.99	1.1	1.045	0.0777817
	∆flv4	0.348	0.347	0.3475	0.000707107		∆flv4	1	1.1	1.05	0.0707107		∆flv4	0.57	0.55	0.56	0.0141421		∆flv4	1.97	1.88	1.925	0.0636396
	Day 5	OD 750 nm					Day 5	OD 750 nm					Day 5	OD 750 nm					Day 5	OD 750 nm
	Strain	Replicate 1	Replicate 2	Average	±SD		Strain	Replicate 1	Replicate 2	Average	±SD		Strain	Replicate 1	Replicate 2	Average	±SD		Strain	Replicate 1	Replicate 2	Average	±SD
	WT	0.471	0.458	0.4645	0.00919239		WT	1.416	1.356	1.386	0.0424264		WT	0.691	0.688	0.6895	0.00212132		WT	2.51	2.493	2.5015	0.0120208
	∆flv1/∆flv3	0.203	0.194	0.1985	0.00636396		∆flv1/∆flv3	0.155	0.163	0.159	0.00565685		∆flv1/∆flv3	0.691	0.688	0.6895	0.00212132		∆flv1/∆flv3	1.407	1.473	1.44	0.046669
	∆flv4	0.445	0.448	0.4465	0.00212132		∆flv4	1.413	1.518	1.4655	0.0742462		∆flv4	0.691	0.688	0.6895	0.00212132		∆flv4	2.505	2.403	2.454	0.0721249
	Day 8	OD 750 nm					Day 8	OD 750 nm					Day 8	OD 750 nm					Day 8	OD 750 nm
	Strain	Replicate 1	Replicate 2	Average	±SD		Strain	Replicate 1	Replicate 2	Average	±SD		Strain	Replicate 1	Replicate 2	Average	±SD		Strain	Replicate 1	Replicate 2	Average	±SD
	WT	0.978	0.894	0.936	0.059397		WT	2.61	2.514	2.562	0.0678823		WT	1.5	1.518	1.509	0.0127279		WT	3.44	3.315	3.3775	0.0883883
	∆flv1/∆flv3	0.218	0.221	0.2195	0.00212132		∆flv1/∆flv3	0.1	0.112	0.106	0.00848528		∆flv1/∆flv3	1.5	1.518	1.509	0.0127279		∆flv1/∆flv3	2.535	2.682	2.6085	0.103945
	∆flv4	0.945	0.958	0.9515	0.00919239		∆flv4	2.541	2.772	2.6565	0.163342		∆flv4	1.5	1.518	1.509	0.0127279		∆flv4	3.399	3.24	3.3195	0.11243
