# Supplementary material for: Flavodiiron proteins 1–to-4 function in versatile combinations in O2 photoreduction in cyanobacteria
Source: eLife. 2019 Jul 11;8:e45766. doi: 10.7554/eLife.45766 (PMC6658166; doi:10.7554/eLife.45766)
Supplement: Figure 5—source data 1. [file elife-45766-fig5-data1.xlsx]

## Sheet: Figure 5- Source data 1
	Figure 5- Source data 1. Rates of O2 reduction in response to increasing light intensity in WT, ∆flv1/∆flv3 and ∆flv4 mutant cells.
		Strain	Light intensity (µmol photons m-2 s-1)	Maximun rate of light-induced O2 uptake (µmol O2.mg Chla -1.hr-1)					Gross O2 evolution rate (µmol O2.mg Chla -1.hr-1)
				Replicate 1	Replicate 2	Replicate 3	Average	± SD	Replicate 1	Replicate 2	Replicate 3	Average	± SD
	5A	WT	500	35.0433	41.4858	47.012	41.1804	5.99023	134.014	151.393	157.037	147.481	11.9999
			1000	91.6062	92.097	79.4306	87.7113	7.17545	257.454	249.642	215.128	240.741	22.5233
			1500	102.169	101.147	85.9502	96.4221	9.08331	228.965	273.229	301.506	267.9	36.563
	5B	∆flv1/∆flv3	500	11.1357	12.8722	13.5056	12.5045	1.22699	123.583	152.779	165.435	147.266	21.4641
			1000	22.3783	23.7874	16.7428	20.9695	3.72762	156.922	135.669	126.787	139.792	15.4849
			1500	25.4118	26.8481	21.1265	24.4621	2.9767	167.22	142.035	113.616	140.957	26.8184
	5C	∆flv4	500	15.0226	9.07336	19.0027	14.3662	4.99712	123.618	131.652	140.987	132.086	8.69247
			1000	36.1378	34.4887	26.0369	32.2211	5.41881	190.889	187.566	148.799	175.751	23.4006
			1500	45.478	41.8457	34.6514	40.6584	5.51007	198.811	198.455	193.303	196.856	3.08239
