# Supplementary material for: Flavodiiron proteins 1–to-4 function in versatile combinations in O2 photoreduction in cyanobacteria
Source: eLife. 2019 Jul 11;8:e45766. doi: 10.7554/eLife.45766 (PMC6658166; doi:10.7554/eLife.45766)
Supplement: Figure 6—source data 1. [file elife-45766-fig6-data1.xlsx]

## Sheet: Figure 6- Source data 1
	Figure 6- Source data 1. Rates of O2 reduction of WT, ∆flv1/∆flv3 and ∆flv4 mutant cells grown at different inoculum size.
	6A	Inoculum size OD 0.2
		O2 uptake rate (µmol O2.mg Chla -1.hr-1)															Gross O2 evolution rate (µmol O2.mg Chla -1.hr-1)
		Dark respiration (average of rates between 0-3 min)					Maximun rate of light-induced O2 uptake during phase I					Light induced O2 uptake during phase III (average of rates between 6-8 min)					Average rates betwee 6 to 8 min of illumination
	Strain	Replicate 1	Replicate 2	Replicate 3	Average	±SD	Replicate 1	Replicate 2	Replicate 3	Average	±SD	Replicate 1	Replicate 2	Replicate 3	Average	±SD	Replicate 1	Replicate 2	Replicate 3	Average	±SD
	WT	7.79458	3.71997	5.44243	5.65233	2.0454	56.9193	49.0652	51.6561	52.5469	4.00212	22.8919	24.9822	26.0196	24.6312	1.59313	195.282	167.825	185.741	182.949	13.9401
	∆flv1/∆flv3	3.00797	3.98014	3.44218	3.47677	0.487006	13.1872	7.04409	10.3314	10.1876	3.07409	6.12255	1.09195	2.16636	3.12695	2.6493	120.167	140.583	174.425	145.058	27.4044
	6A	Inoculum size OD 0.5
		O2 uptake rate (µmol O2.mg Chla -1.hr-1)															Gross O2 evolution rate (µmol O2.mg Chla -1.hr-1)
		Dark respiration (average of rates between 0-3 min)					Maximun rate of light-induced O2 uptake during phase I					Light induced O2 uptake during phase III (average of rates between 6-8 min)					Average rates betwee 6 to 8 min of illumination
	Strain	Replicate 1	Replicate 2	Replicate 3	Average	±SD	Replicate 1	Replicate 2	Replicate 3	Average	±SD	Replicate 1	Replicate 2	Replicate 3	Average	±SD	Replicate 1	Replicate 2	Replicate 3	Average	±SD
	WT	6.54481	5.25008	-1.18251	3.53746	4.13856	45.362	33.8622	42.8261	40.6834	6.04191	14.4379	15.4706	23.5428	17.8171	4.98543	151.125	124.425	147.721	141.09	14.5325
	∆flv1/∆flv3	10.1414	9.43347		9.78744	0.500592	2.98809	-1.83738		0.575356	3.41212	-6.01942	-1.81565		-3.91754	2.97251	138.685	160.834		149.76	15.6621
